# Supplementary material for: Self-assembled multilayer of alkyl graphene oxide for highly selective detection of copper(ii) based on anodic stripping voltammetry
Source: Royal Society of Chemistry journal article supplement (doi:10.1039/c2jm34795d), 2012-01-01
Supplement: c2jm34795d.pdf [file c2jm34795d.pdf]

## Supporting Information

### Self-assembled multilayer of alkyl graphene oxide for highly selective detection of copper(II) based on anodic stripping voltammetry

Wen Zhang,<sup>†ab</sup> Juan Wei,<sup>†a</sup> Houjuan Zhu,<sup>ab</sup> Kui Zhang,<sup>a</sup> Fang Ma,<sup>ab</sup> Qingsong Mei,<sup>a</sup> Zhongping Zhang<sup>ab</sup> and Suhua Wang<sup>\*ab</sup>

<sup>a</sup> Institute of Intelligent Machines, Chinese Academy of Sciences, Hefei, Anhui, 230031, China.

<sup>b</sup> Department of Chemistry, University of Science & Technology of China, Hefei, Anhui, 230026, China.

E-mail: shwang@iim.ac.cn

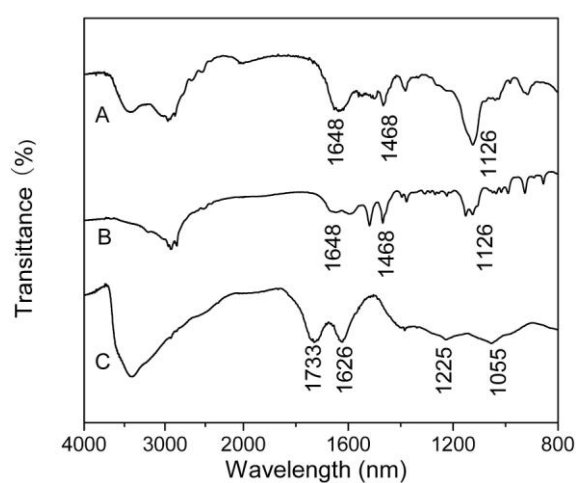

**Fig. S1** FT-IR spectra of (A) GO-C3Me, (B) GO-C7Me and (C) GO, showing the amide formation of alkylamine functionalized GO.

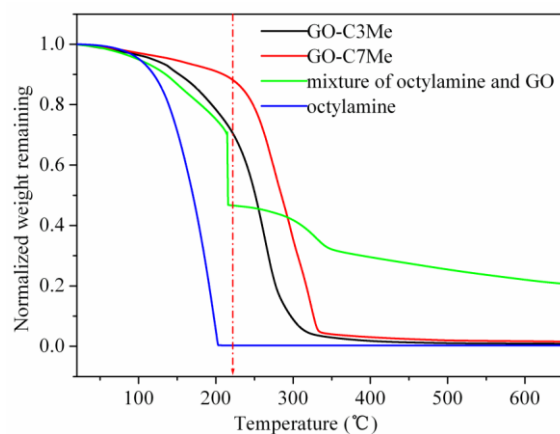

**Fig. S2** TGA profiles of pure octylamine, simple mixture of octylamine and GO, GO-C7Me, and GO-C3Me sample. There is only one weight-loss process for both GO-C7Me and GO-C3Me samples, indicating the covalent attachment of alkylamine to GO. There are two weight-loss steps in the simple mixture of octylamine and GO, which can be attributed to the thermal decomposition of octylamine and GO respectively.

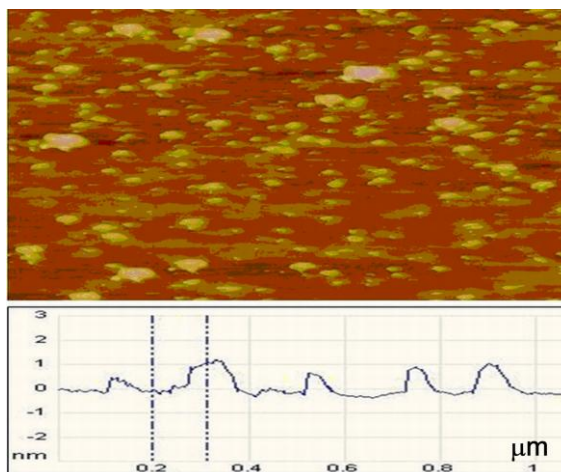

**Fig. S3** AFM image and cross-section analysis of single GO-C7Me nanosheets on mica substrate. The thickness of a single GO nanosheet is estimated to be about 1 nm. The unit of the horizontal ordinate is micrometer ( $\mu\text{m}$ ).

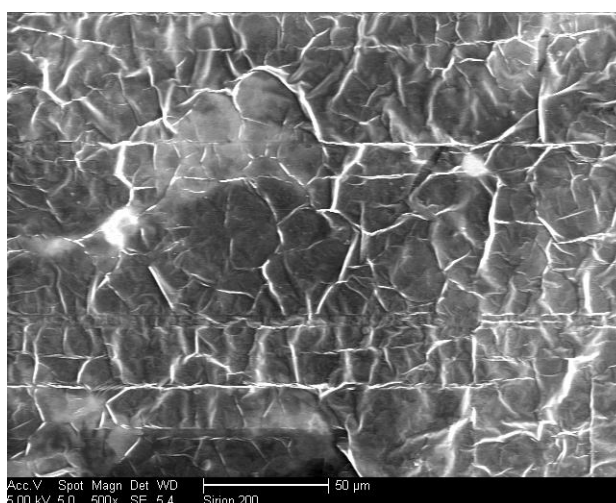

**Fig. S4** SEM image of GO-C7Me self-assembled multilayer on amorphous Si substrate.

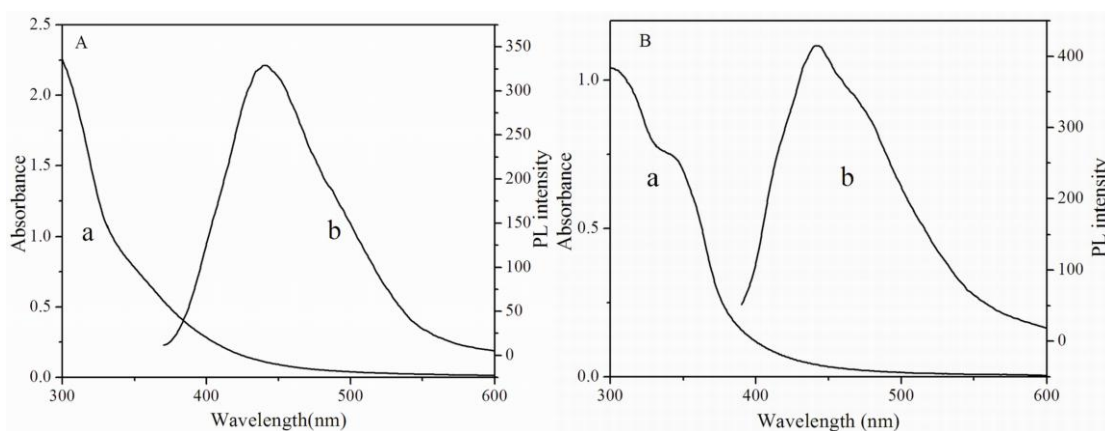

**Fig. S5** (A) UV-vis absorption of GO-C3Me in water (3 mg/mL) (a), the fluorescence spectrum of GO-C3Me in water (75  $\mu\text{g/mL}$ ) (b); (B) UV-vis absorption of GO-C7Me in ethanol (5 mg/mL) (a), the fluorescence spectrum of GO-C7Me in ethanol (200  $\mu\text{g/mL}$ ) (b).

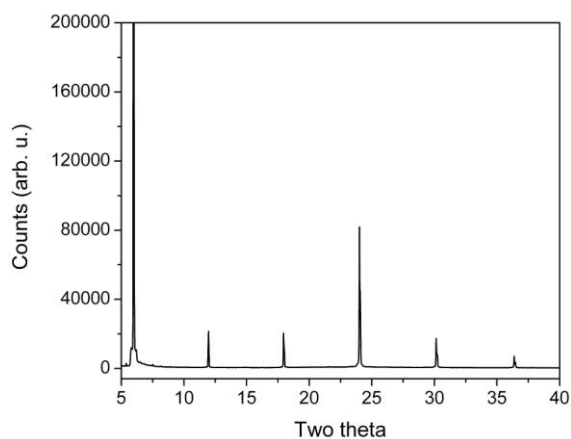

**Fig. S6** X-ray diffraction patterns of GO-C3Me on Si substrate.

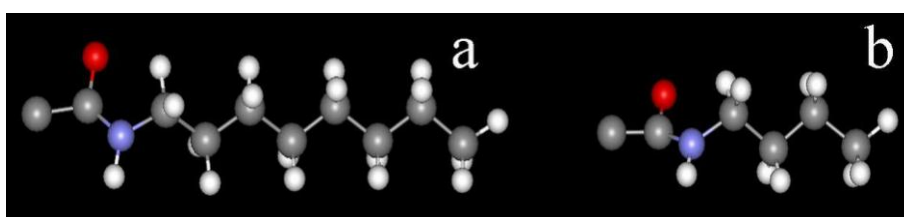

**Fig. S7** Simulated length of the molecule chain used in the chemical reaction (a) octylamine, and (b) n-butylamine. Calculation results are summarized in Table S1.

**Table S1.** Comparison between the interlayer spacing obtained from XRD measurement and computer simulation

|                                  | GO-C3Me (nm) | GO-C7Me (nm) |
|----------------------------------|--------------|--------------|
| molecular chain length ( $d_s$ ) | 0.857        | 1.381        |
| $2d_s$                           | 1.714        | 2.762        |
| interlayer spacing from XRD      | 1.472        | 2.255        |

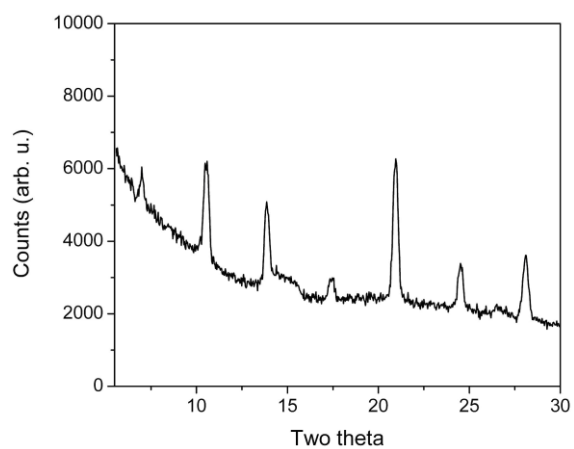

**Fig. S8** X-ray diffraction patterns of GO-C7Me self-assembled on Au electrode substrate, showing the same regular ordered structures as on amorphous Si substrate.

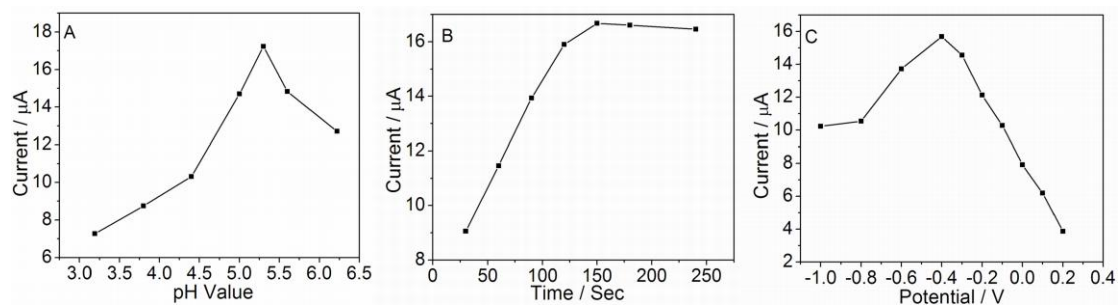

**Fig. S9** Effect of different parameters on the peak current of SWASV on GO-C7Me film in 100  $\mu\text{M}$   $\text{CuCl}_2$  solution. (A) pH value of the solution; (B) pre-concentration time, and (C) accumulation potential.

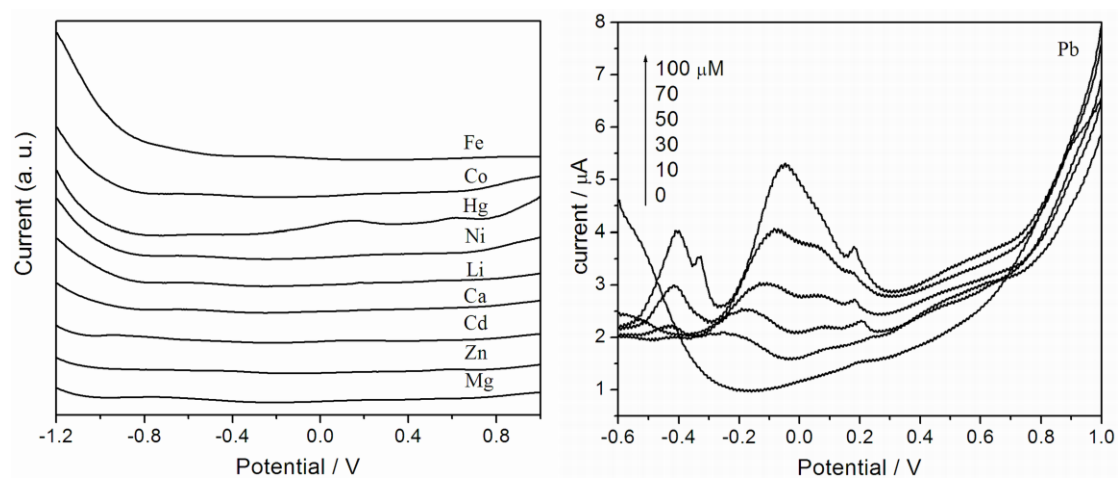

**Fig. S10** SWASV responses of the GO-C7Me modified Au electrode toward other metal at 100  $\mu\text{M}$  in NaAc buffer with pH of 5.3.

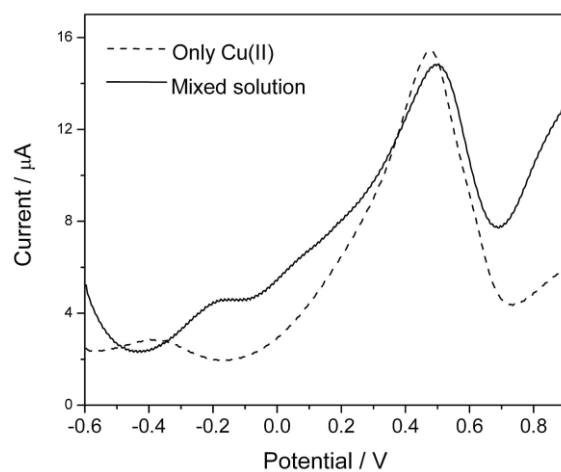

**Fig. S11** SWASV response of the GO-C7Me modified electrode toward Cu(II) in solution containing Fe(III), Li(I), Mn(II), Ni(II), Ca(II), Mg(II), Cd(II), Na(I), Hg(II), Co(II), Zn(II), Pb(II) cations with the same concentration of 100  $\mu\text{M}$ . The electrochemical stripping detection conditions are the same as in Fig. 3.

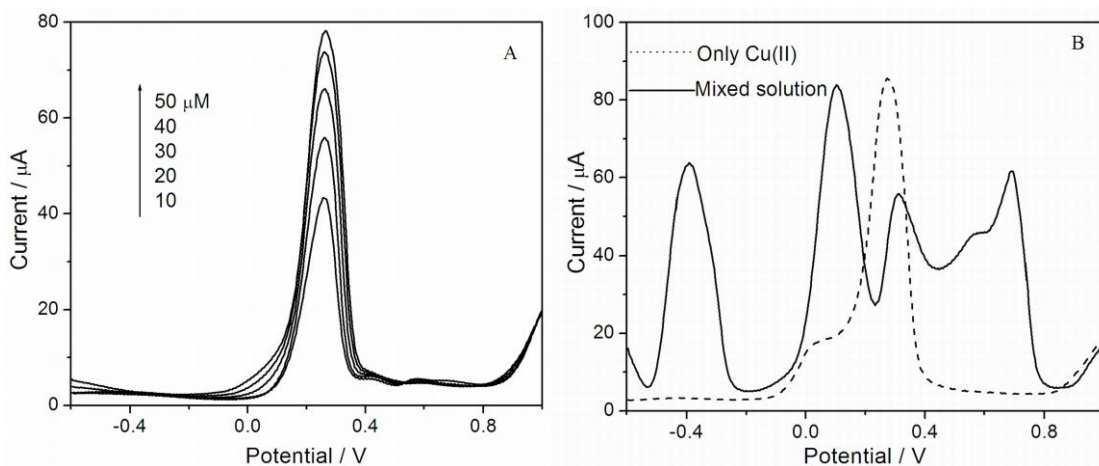

**Fig. S12** (A) SWASV response of the bare Au electrode toward pure Cu(II); (B) SWASV responses of the bare Au electrode toward Cu(II) in the presence of Li(I), Mn(II), Ni(II), Ca(II), Mg(II), Cd(II), Na(I), Hg(II), Co(II), Zn(II), Pb(II) with the concentration of 100  $\mu\text{M}$ . The electrochemical stripping detection conditions are the same as in Fig. 3.

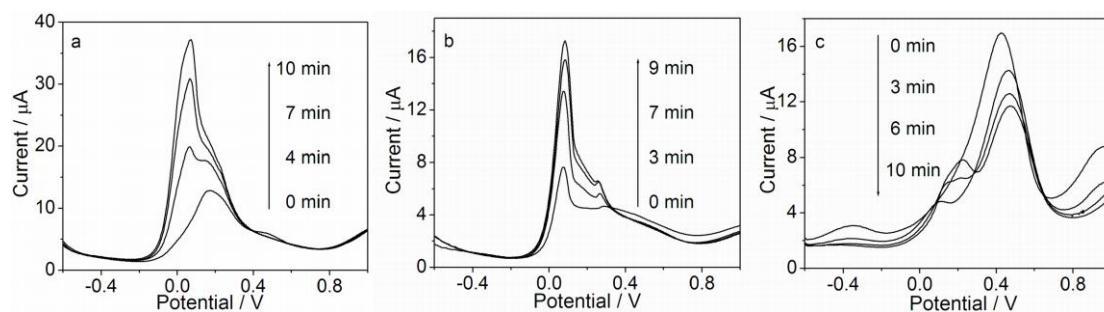

**Fig. S13** SWASV response of (a) GO-C3Me, (b) GO and (c) GO-C7Me film toward Cu(II) (100  $\mu\text{M}$ ) at different time. The electrochemical stripping detection conditions are the same as in Fig. 3.

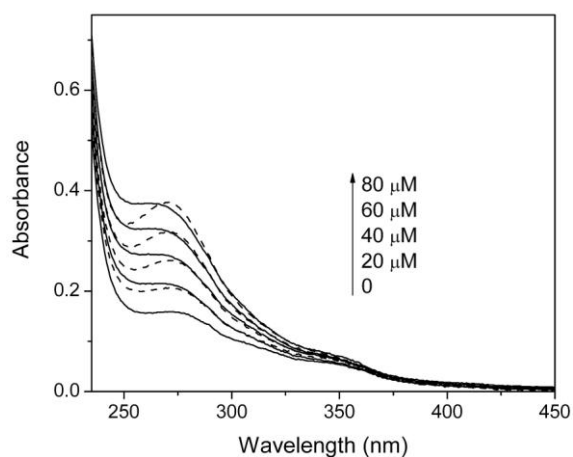

**Fig. S14** The solid lines represent the change in the UV-vis spectrum of GO before and after the addition of Cu(II) at concentrations of 0, 20, 40, 60, 80  $\mu\text{M}$ ; The dash lines represent the overlapped absorption of GO and Cu(II) at concentrations of 0, 20, 40, 60, 80  $\mu\text{M}$ .
